# Supplementary material for: Suicide risk assessment and intervention in people with mental illness
Source: HighWire-hosted journal article supplement (doi:10.1136/bmj.h4978), 2015-11-09
Supplement: bmj.h4978.pdf [file bmj.h4978.pdf]

## 精神疾病患者的自杀风险评估及干预措施

### Suicide risk assessment and intervention in people with mental illness

来源:BMJ 2015;351:h4978 doi: 10.1136/bmj.h4978

#### 摘要

自杀是全球第15大致死原因,虽然自杀在一般人群中比较少见,但精神疾病患者的自杀率却一直居高不下。临床医师必须及时识别并处置自杀风险。然而,自杀风险评估是一项极具挑战性的工作,因为传统的自杀风险评估常依赖于患者本人的报告,而患者往往隐瞒其自杀意图。准确的自杀预测方法还在研究评估中。一些新型的评估方法,如经验衍生工具、隐式关联测验等,已展示出较大的发展潜力。以往为自杀患者提供的服务往往是不规范的,尤其是在患者离开医院或急诊室这些他们最需要接受评估的时候。尽管已具备了一些药物和心理的自杀干预方法,但迄今为止,我们仍无法确定哪种方法能最有效地降低自杀风险。一些肯定证据表明,在传统的方法中,锂盐和认知行为治疗等可以有效预防自杀;而氟胺酮和以互联网为基础的心理治疗等新兴的自杀预防方法也是可供选择的方案之一。本文总结了当前自杀预防的最新进展,回顾了自杀风险干预的常用方法,并着重探讨了精神障碍患者的临床管理方案。

#### 前言

自杀是重要的国际公共卫生问题,平均每40秒就有1人死于自杀<sup>1</sup>。自杀是15~29岁青少年死亡的第二位原因,在2012年,已导致3900万人出现不同程度的残疾<sup>2</sup>。自杀将牵连至少6位自杀者的亲属或朋友,使得他们发生抑郁或自杀的风险升高<sup>3,5</sup>。每30位尝试自杀者中,有1位自杀死亡成功;在美国,尝试自杀者人数达到100万<sup>6</sup>。自杀所造成的经济损失

和自我危害是相当大的,在美国,其所造成的直接或间接损失达到410亿美元<sup>7</sup>。提高对自杀高风险人群的识别及发展有效的自杀预防策略是国家研究机构和政府自杀预防策略的首要目标<sup>8</sup>。

目前,已有几篇文献归纳了自杀的预防、流行病学和风险因素<sup>9-12</sup>。本篇综述将从自杀风险人群的临床护理和自杀风险评估及干预两方面进行补充。我们重点关注具有心理问题的人群,但不会采用已被广泛应用的公共健康策略来预防自杀。首先,我们将描述自杀和自杀行为的流行病学特征,并强调特定的高自杀风险

James M Bolton,<sup>1</sup>  
David Gunnell,<sup>2</sup>  
Gustavo Turecki<sup>3</sup>

<sup>1</sup>Departments of Psychiatry, Psychology, and Community Health Sciences, University of Manitoba, Winnipeg, MB, R3E 3N4, Canada  
<sup>2</sup>School of Social and Community Medicine, University of Bristol, Bristol, UK  
<sup>3</sup>Departments of Psychiatry, McGill University, Montreal, QC, Canada

Correspondence to:  
J M Bolton  
jbolton@hsc.mb.ca

#### 来源和选择标准

本文的参考文献主要通过全面检索PubMed以及某些已发表论文所得。同时我们也参考了Google中的相关参考文献和指南,以便弥补PubMed中缺失的文献。优先引用系统性综述和荟萃分析,随机对照研究则根据其样本量大小及实施的质量进行选择。我们将检索的范围设定为1990年1月1日—2015年2月1日发表的英文文章。检索词包括:suicide, self harm, risk assessment, guidelines, intervention, outreach, follow-up, medication (and specific types), pharmacotherapy, electroconvulsive therapy, psychotherapy (and specific types), 以及通过具体条目来限定的临床人群(emergency department, inpatients, discharge)。检索过程由作者及3名研究人员进行。我们回顾和总结了这些检索的文章和指南,然后确定出将被引用到本文的文献。

李伟译  
肖世富校  
上海交通大学  
医学院附属  
精神卫生中心

亚群。随后,我们将详细讨论风险评估的方法,同时将回顾特定的评估工具和风险评估的演变历程。而那些能有效降低自杀行为或预防自杀的干预措施,如药物治疗、心理治疗及随访措施等也将详细描述。鉴于自杀是一项日益突出的健康问题,并且是临床医生急需解决的问题,本文将提供以证据为基础的评估和治疗策略,以便帮助临床医生应对这类风险人群。

## 流行病学

自杀是目前全球第15大致死原因。在2012年,已有80 400人死于自杀,占全球总死亡人数的1.4%,在普通人群中的发生率为11.4/10 000<sup>1</sup>。在一些高收入国家中,男性的自杀率大概是女性的3倍,其风险因素包括自残、抑郁、乙醇滥用、躯体疾病、社会地位低下和婚姻破裂等<sup>10-11</sup>。

具有心理问题的患者自杀或自残风险远高于一般人群<sup>13-14</sup>(图1)。一项为期36年、基于丹麦人群的随访研究指出,门诊或者住院的精神障碍患者的自杀风险显著高于一般人群,其男女的自杀比率分别为4%和2%<sup>15</sup>。不同疾病的自杀比率不同,风险最高的是那些存在并发症及有过自杀、自伤史的患者。这种风险在不同的疾病人群中也存在差异,而精神疾病患者的自杀风险更高<sup>13</sup>。在所有精神障碍被诊断后的最初几个月内,自杀的风险最高<sup>16-18</sup>。而这些风险也将受到治疗因素的影响,我们将随后描述。

### 住院期间与近期出院

尽管住院能为寻死者提供相对安全的环境,但他们的自杀风险仍然很高。据报道,平均每年每1 000张病床中就有5人死于自杀<sup>19</sup>。一项汇集了27项研究的荟萃分析显示,每年死于自杀的住院患者的比率为147/100 000,而单项研究表明,这一比率为860/10 000<sup>20</sup>。自杀通常发生于入院的早期阶段,大约40%的自杀发生于入院的前3天<sup>21</sup>。入院前自杀未遂将显著增加住院患者的自杀风险。在患者出院后的1周及几个月内的自杀风险仍较高,但随后风险缓慢下降(图2)<sup>22-24</sup>。英国一项全国性精神疾病患者自杀风险研究指出,有1/4的自杀发生于出院后的3个月内<sup>25</sup>。几乎有一半的患者在3个月内死于自杀,而自杀的时间常发生于他们随访后的第一个月内<sup>26</sup>。有过自杀尝试的精神疾病

患者,其出院后的自杀风险极高。瑞典的一项观察性研究显示,大约1/5的精神分裂症或双相障碍患者在出院后的第一年内死于自杀<sup>27</sup>。

### 急诊

急诊是自杀者和施救者交汇的场所。因自杀而送入急诊的患者,其未来的自杀风险很高;2%的该类人群将在1年内死于自杀,且5年的平均自杀率为4%<sup>28</sup>,大约是普通人群的50倍,使自杀患者的预期平均寿命减少40年<sup>29-30</sup>。就诊后第一个月的重复自杀率为10%,在6个月的时候达到27%<sup>31-32</sup>。

### 就诊后的高自杀风险

最近的一些研究指出,需要在更短的时间内进行自杀预防,如小时、天和星期等<sup>33-34</sup>,在急诊或其他急救部门里显得尤为重要。这种说法与当前的趋势相吻合:目标设定为高风险时期预防,特别是在临床处置后<sup>35</sup>。不过,这将使临床医师陷入两难的境地,因为患者在治疗结束后特别容易复发。未来的研究需要发展更加准确、有效的自杀风险评估方法,确保可以在几小时或几天内评估患者的自杀风险,以便治疗机构可以有效地应对这些风险<sup>35</sup>。

### 自杀风险评估

自杀风险的概念仍存争议,并且受到某些自杀研究者的质疑。尽管国家推荐的指南提供了风险

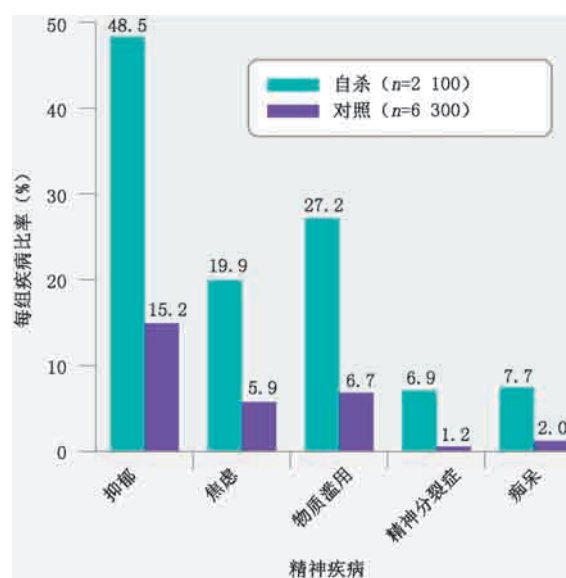

图1 1996—2009年马尼托巴及加拿大死于自杀的精神疾病患者与正常人群中死于自杀的比率(3:1),两组人群已进行了年龄、性别、收入、居住地和婚姻状况上的匹配<sup>16</sup>。

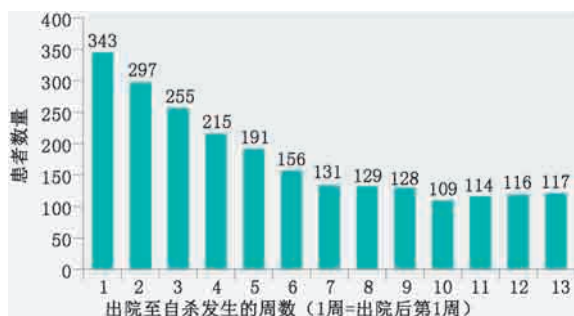

图2 2003—2013年,英国精神疾病患者在出院每周的自杀数量<sup>27</sup>

评估的建议,但还没有广泛接受的医疗标准。而风险评估的内容也同样是个难题。风险评估往往是风险评估工具和量表的代名词,充其量代表了可以向患者询问自杀观念和计划的过程。风险评估常在急诊或特定的精神心理部门进行,大约30%的美国成年人在实施自杀前曾就诊于初级医疗保健中心<sup>36</sup>,但这些机构却没有特别重视自杀风险评估。

自杀风险评估的框架通常是一致的:建议收集既往的自杀风险信息;当前的自杀想法和计划;精神症状及心理状态(绝望、压力、冲动、自控能力);准备采用的高致死性方法(如枪支等)和保护性因素等<sup>37-39</sup>。在实施评估的过程中,医师与患者建立协同和治疗联盟是非常重要的<sup>40</sup>。即使急诊中简短的精神检查都可以降低40%的自杀风险<sup>41</sup>。自杀行为的协同评估和管理(CAMS)就是这样一种治疗方法,在1年的随访中,已证实可以提高治疗效果和降低自杀观念<sup>42</sup>。此方法涉及4~12个方面,在实施该方法的过程中,临床医师和患者可以共同参与到标准化的模式当中,并可以深入探讨患者的自杀观念和应对策略。

#### 询问自杀是否会促进患者采取自杀行为

医师和患者都认为应该询问抑郁患者是否存在自杀的观念,但很多临床医师并未接受过系统的自杀风险评估训练<sup>43</sup>。而且有相当一部分医师认为询问是否存在自杀想法会诱导患者做出相应的行为。2004年发表的一篇系统性综述纳入了2001—2013年发表的13项研究,结果表明询问患者是否存在自杀观念并不会导致自杀风险的升高<sup>44</sup>。这篇综述包含了成人和青少年的研究,其方法学既包括小型的队列研究,还包括大型的随机对照试验(RCT)。值得注意的是,一项RCT研究表明<sup>45</sup>,对普通人群、抑郁患者及先前有过自伤经历的患者询问其是否存在自杀的观念,并不会增加他

们的痛苦或自杀的风险。

#### 风险评估面临的挑战

获得准确的自杀风险评估是极其困难的。其中最大的挑战是确定哪些是真正的高风险并最终死于自杀的人群。任何评估工具在评估普通人群中发生率相对较低的事件(如自杀)时,其阳性预测值(PPV)都有可能很低,即使该量表本身的敏感性和特异性很高(统计测试的定义见框图1)<sup>46</sup>。例如,有许多人被不恰当的贴上高风险的标签,并给予许多并不需要的资源,如强制入院等。风险评估的另一挑战是,往往依赖于主观报告的信息,当对患者进行风险评估时,临床医师有可能被误导。一项研究指出,将近80%最终死于自杀的患者,在其最后与医师交流的过程中会否认自杀观念<sup>47</sup>。这也促进了寻找其他可供选择的监测手段的研究,这其中就包括了基于计算机的内隐联想测验(IAT),它被认为比患者的自我报告和临床医师的意见更为敏感<sup>48</sup>。

#### 框图1 自杀相关统计检测方法的定义和参数

**敏感性:**利用自杀风险评估工具确定的高自杀风险的患者最终死于自杀的比率,敏感性与假阴性率呈负相关。

**特异性:**利用自杀风险评估工具确定的无自杀风险的患者最终没有死于自杀的比率。特异性与假阳性率呈负相关。

**阳性预测值(PPV):**检测“真阳性”的PPV统计指标:被自杀风险评估工具判定为具有自杀风险(无论判定的是错还是对)的人群最终死于自杀的比率(自杀/阳性测验结果)。高的假阳性率或低的自杀率(或者两者都有)将会降低PPV。

**阴性预测值(NPV):**检测“真阴性”的NPV统计指标:最终没有实施自杀的人与被自杀风险评估工具判定为不具有自杀风险(无论判定的是错还是对)的人的比率(非自杀/阴性测验结果)。高的假阴性率将会降低NPV。NPV倾向于高估自杀率。

#### 风险评估量表的转变

传统自杀风险量表的研发并非基于经验。最近几十年内,已开发了许许多多的量表和评估工具,但很少经过大数据的检验<sup>49</sup>,而且也从未检测过对自杀行为的预测作用。在对急诊常用的量表进行系统评估后,发现仅有12个量表是合格的<sup>50</sup>。因此,当前的研究重点已转移到对风险评估工具的



演变和评估上。该领域的另一个重要转变是,已将依赖于访谈的工具转变为不依赖于访谈的工具。表1列出了这些量表预测自杀风险的能力,包括敏感性、特异性、PPV以及阴性预测值(NPV)等。

### 传统的风险评估量表

发展自杀风险量表的传统方法是基于信度和效度收集可能的风险因素。研究最多的量表包括Beck绝望量表(BHS)、Beck抑郁问卷(BDI)、Beck自杀观念量表(BSS)、自杀企图量表(SIS)和悲伤量表等。

#### BHS

对精神疾病住院和门诊患者的研究表明,BHS可以预测5~20年的自杀风险<sup>51-52,54,63</sup>。一些研究表明,自杀成功和自杀未遂者在BHS得分上存在差异,因此,BHS被认为是一个成功的预测工具;然而它的特异性较低。一项美国研究指出其阳性率为1%<sup>54</sup>。随后一项汇集了10个BHS(4个调查了自杀、6个为非致死性的自我伤害)的荟萃分析表明,BHS的敏感性为78%~80%,而特异性仅为42%<sup>56</sup>。

#### BDI和BSS

前面提到的美国研究表明,BDI和BSS预测自杀风险的准确度同样较低,其PPV分别为2%和3%<sup>54</sup>。

#### SIS

一项SIS回顾性研究发现,该量表曾被用于158项研究<sup>64</sup>,其中有13项研究评估了预测自杀风险的能力,17项研究评估了预测自我伤害的能力。对于自杀的预测作用,大部分研究证实量表得分与后续的自杀行为并无显著相关,仅有2项研究报道了阳性结果<sup>57-58</sup>。PPV在2项研究中较低(4%和10%),但在55岁以上人群中较高,为23%<sup>57</sup>。随后瑞典的一项研究评估了SIS预测具有自杀史的出院患者在10~15年内自杀风险的能力,结果表明,该量表的特异性为52%,PPV为17%<sup>59</sup>。总之,这些研究表明预测自杀风险的准确度较低,随访的时间和混杂因素可能会影响PPV。

#### 悲伤量表

悲伤量表由10个条目组成,每个字母都对应着一个潜在的自杀风险<sup>65</sup>。尽管悲伤量表在发展历程中并未得到正规的检测,但它是目前自杀风险评估里应用最多的量表之一。在英国具有代表性的住院人群中,悲伤量表应用的最为普遍<sup>66</sup>。一项最新的系统性综述表明<sup>67</sup>,仅有3项研究检测了它预测自杀的能力,但3项研究均未发现它的预测作用。悲伤

量表预测急诊患者6个月内自我伤害的PPV为5%,而预测1年后自杀风险的PPV为23%<sup>60,68</sup>。

#### 自杀评估量表(SUAS)和人际暴力量表(KIVS)

这2个量表也常用来评估自杀观念<sup>62,69</sup>。具有20个测验项目的SUAS可用于评估情绪、人格特征和自杀想法及行为。一项研究曾利用SUAS来预测1年以上的自杀风险,结果表明该量表具有75%的敏感性和85%的特异性,但它的PPV仅为19%<sup>61</sup>。KIVS量表包含了2个分量表,分别用于评估儿童和成人暴露于暴力的风险,常用作风险评估工具,它的基础来源于观察,即尝试自杀的人常合并有更高的侵略性和冲动性。当将其应用于预测自杀未遂患者的4年自杀率时,2个分量表具有80%~88%的敏感性和更低的特异性(60%~65%),以及更低的PPV(范围为7%~14%)<sup>62</sup>。

#### 新型自杀风险评估量表

哥伦比亚自杀严重程度评定量表(C-SSRS)、自杀诱发量表(STS)及自杀概率量表(SPS)是基于传统方法演变而来的量表。

C-SSRS可以检测自杀者想法和行为的4个维度,包括自杀观念的严重性、强度、自杀行为的类型及自杀观念的致死性<sup>70</sup>。一项研究表明,它预测未来自杀行为的敏感性和特异性分别为67%和76%<sup>71</sup>。一项包含3776例的混合样本研究(合并抑郁和创伤后应激障碍,以及合并癫痫和纤维肌痛的患者),在随访中,有201例(5.3%)曾实施过自杀行为。在平均9周的随访中,C-SSRS基线预测自杀风险的PPV为14%,NPV为98%。

STS基于5个与自杀相关的领域发展而成,这5个领域分别为:自杀倾向、情绪症状、创伤、冲突及依恋。一项基于精神疾病住院患者的研究表明,STS与C-SSRS和BSS相比,只有STS可以预测6个月内的自杀风险<sup>72</sup>。这是一项以有限的样本来直接比较风险评估量表效能的例子。

#### 源自经验的工具

一些新的研究方法采用了更强大的经验方法,即通过大数据数据库发展预测工具,再通过另一个数据库来进行验证。

#### 曼彻斯特自我伤害法则

此工具来源于10000名因自伤而被送入急诊进行治疗的患者的数据,共包含了50个候选变量<sup>73</sup>。通过评估其4个临床变量(中-高风险因素)可以有效预测在6个月内发生自杀、自伤的概率,

表1 风险评估工具预测自杀风险的相关研究

| 第一作者                            | 样本人群(n)               | 自杀数量(%)  | 量表界值      | 相关统计量                                                | 随访     |
|---------------------------------|-----------------------|----------|-----------|------------------------------------------------------|--------|
| <b>Beck 绝望量表 (BHS)</b>          |                       |          |           |                                                      |        |
| Beck(1985) <sup>51</sup>        | 合并有自杀观念的精神疾病住院患者(207) | 11(6.7)  | 9         | 敏感性91%<br>特异性51%                                     | 10年    |
| Beck(1990) <sup>52</sup>        | 精神疾病出院患者(1958)        | 17(0.9)  | 8         | 敏感性94%<br>特异性41%                                     | 7.5年   |
| Nimeus(1997) <sup>53</sup>      | 合并有自杀观念的精神疾病住院患者(212) | 13(6.1)  | 13        | 敏感性77%<br>特异性61%<br>PPV13%                           | 8年     |
| Brown(2000) <sup>54</sup>       | 精神疾病出院患者<br>(6891)    | 49(0.7)  | 8         | PPV 1%<br>NPV 100%                                   | 20年    |
| Suominen(2004) <sup>55</sup>    | 自杀未遂的患者(212)          | 17(7.6)  | 无         | 敏感性60%<br>特异性52%                                     | 12年    |
| McMillan(2007) <sup>56</sup>    | 荟萃分析                  | 无        | 9         | 敏感性80%<br>特异性42%                                     | 5~12年  |
| <b>Beck 抑郁问卷 (BDI)</b>          |                       |          |           |                                                      |        |
| Beck (1990) <sup>52</sup>       | 精神疾病出院患者<br>(1958)    | 17(0.9)  | 22        | 敏感性77%<br>特异性64%                                     | 7.5年   |
| Brown (2000) <sup>54</sup>      | 精神疾病出院患者<br>(6891)    | 49(0.9)  | 22        | PPV 2%<br>NPV100%                                    | 20年    |
| <b>Beck 自杀观念量表 (BSS)</b>        |                       |          |           |                                                      |        |
| Brown (2000) <sup>54</sup>      | 精神疾病出院患者<br>(6891)    | 49(0.7)  | 2         | PPV 3%<br>NPV100%                                    | 20年    |
| <b>自杀企图量表 (SIS)</b>             |                       |          |           |                                                      |        |
| Nimeus (2002) <sup>57</sup>     | 有自伤表现的患者(555)         | 22(4.0)  | 19        | 敏感性59%<br>特异性77%<br>PPV 10%                          | 4.5年   |
| Harriss (2005) <sup>58</sup>    | 有自伤表现的患者<br>(2489)    | 54(2.2)  | 10(男)     | 敏感性77%<br>特异性49%<br>PPV 4%                           | 5.2年   |
|                                 |                       |          | 14(女)     | 敏感性67%<br>特异性75%<br>PPV4%                            |        |
| Stefansson (2012) <sup>59</sup> | 有自伤表现的出院患者(81)        | 7(8.6)   | 16        | 敏感性100%<br>特异性52%<br>PPV17%                          | 10~15年 |
| <b>悲伤量表</b>                     |                       |          |           |                                                      |        |
| Kurz (1988) <sup>60</sup>       | 有自伤表现的住院患者(485)       | 13(2.7)  | 5         | 敏感性23%<br>特异性89%                                     | 1年     |
| <b>自杀评估量表 (SUAS)</b>            |                       |          |           |                                                      |        |
| Nimeus (2000) <sup>61</sup>     | 自杀未遂的住院患者(191)        | 8(4.2)   | 39        | 敏感性75%<br>特异性86%<br>PPV19%                           | 1年     |
| <b>人际暴力量表 (KIVS)</b>            |                       |          |           |                                                      |        |
| Jokinen (2010) <sup>62</sup>    | 自杀未遂的患者(161)          | 5(3.1)   | 儿童暴力分量表:3 | 敏感性80%<br>特异性65%<br>PPV7%                            | 4年     |
|                                 |                       |          | 成人暴力分量表:3 | 敏感性88%<br>特异性60%<br>PPV14%                           |        |
| <b>ReACT 自杀法则</b>               |                       |          |           |                                                      |        |
| Steege (2012) <sup>32</sup>     | 有自伤表现的急诊患者(18680)     | 92(0.49) | 1         | 敏感性88%~91%<br>特异性15%~24%<br>PPV 0.4%~0.5%<br>NPV100% | 6个月    |

注:PPV:阳性预测值;NPV:阴性预测值。

具有较高的敏感性(97%)。在该人群中,自伤或自杀的再发生率为17%。这4个变量分别为自我伤害史、既往临床诊疗、服用过量的苯二氮䓬类药物及当前精神疾病性症状治疗的策略等,其优势在于其是相互独立的因素。然而,它的特异性(26%)和PPV(22%)仍是比较低的。同样,这项法则也在瑞典人群中进行了检验,其预测自杀风险的效果跟前面的研究大致相同<sup>74</sup>。

#### ReACT 自杀法则

同样来源于英国的研究小组和数据库,但后续的研究产生了一个稍微不同的预测模型,命名为ReACT 自杀法则<sup>32</sup>。基于不断的重复检测(大约30 000次)、相同的候选变量、衍生及先前的数据库的检验,最终根据统计结果确定了4个预测变量:近期自我伤害、独居及无家可归、以刀割作为自残的方法、当前精神障碍的治疗状况。高风险因素(根据是否存在一种或几种上述风险因素来进行划分)预测6个月内的自杀发生率具有高度的敏感性(88%)和NPV(几乎100%),但其特异性(24%)和PPV(0.5%)仍较低。

#### 重复自杀量表(RESH)

这个统计衍生工具来源于澳大利亚的行政数据库<sup>75</sup>。作者调查了2个州因自伤住院患者6个月出现自伤的基线数据。与英国的研究结论相反(包含了急诊入院的患者),该量表数据仅纳入了住院患者。通过独立样本和验证样本,检测4个变量(先前自我伤害的发作次数、发作次数的间隔、过去1年内诊断为何种精神疾病、过去1年内的住院次数)的工具显示出同等的预测效应。尽管它的敏感性低于英国的工具,但它在更高的分数范围上(>16)显示出较高的敏感性(98%)和PPV(82%)分数。

一项来源于加拿大的样本(4年内在2个医院急诊中就诊的人群,包括自伤及非自伤者)、基于数据(6个月内尝试自杀)研发的评估工具也可预测急诊患者未来的自杀风险<sup>76</sup>。在16个候选变量中,仅2个能有效预测自杀风险:包括当前的自杀观念和精神疾病住院史及自杀未遂史。至少有1个变量已显示高敏感性(91%)和NPV(99%),但预测来自杀风险的敏感性(24%)和PPV(3%)仍较低。在解释这些完成于临床机构的数据结果时,需要考虑一个重要的影响因素,即心理测量工具会随着不同的医疗服务机构的业务水平,以及临床医师对测

量结果的反应而产生不同的变化。

#### 自杀风险评估的新方法

自杀风险评估的新进展包括尝试使用内隐思想和神经认知功能。自杀的内隐思维为自杀风险模型的建立奠定了基础,因为其克服了患者否认(或没有意识到的)自杀企图的挑战。

IAT可以检测患者无意识对某种行为态度的神经测验。当计算机展示出一个图像(与自杀行为相关)或中立的图像的时候,患者按下一个按钮来判断该图像是否与自身相关。这个任务的反应时间可以检测他们实施自杀行为的可能性。一项来源于精神疾病医院急诊、包含了157名住院患者的队列研究表明,特定的、有关生死的IAT测验可以预测未来6个月内的自杀行为,而且不依赖患者所表达的自杀意图和临床医师对自杀行为的判断(敏感性为50%,特异性为81%,PPV 32%,NPV90%)<sup>48</sup>。此结果已得到另一项加拿大急诊队列(纳入了107名患者)研究的证实,其结果表明,有关生死的IAT测验预测3个月内自杀行为的敏感性为43%,特异性为79%<sup>77</sup>。值得注意的是,当使用其他变量时,如先前的自伤、教育水平、精神疾病合并抑郁及非中毒性的自伤等,可有效提高IAT的准确性。

曾有研究分析了几项神经认知测验对检测自杀行为的能力。一项荟萃分析显示,仅有3项神经认知测验与自杀行为明显相关,即斯特鲁普测验、语言流畅性测验和爱荷华赌博任务测验<sup>78</sup>。从概念上讲,这些结果与观测到的结果相匹配,即自杀人群倾向于关注自杀观念(注意转换受损),他们很难去寻求外界的帮助(语言流畅性缺陷),此外他们更易出现冲动和危险行为(决策障碍)。然而,几乎所有这类研究都是横断面的,它们预测来自杀风险的准确性还不得而知。唯一的例外是美国的一项前瞻性研究(他们曾对一个精神病院急诊的124例患者进行了斯特鲁普测验)<sup>79</sup>。在控制了各种因素(包括自杀史、自杀观念的严重性及临床医师和患者本身对自杀行为的预测)之后,对自杀话题的注意偏移也可以独立预测6个月内的自杀企图。

#### 自杀风险评估是否值得?

世界卫生组织(WHO)建议所有10岁以上的精神疾病患者和合并其他自杀风险因素的人群均应详细询问过去1个月内的自伤想法和计划<sup>1</sup>。但对



这些量表和工具的使用则充满争议。英国国家健康与临床优选研究所(NICE)指南鼓励对患者进行风险评估,但反对使用评估工具来决定患者是否入院和进行治疗<sup>80</sup>。同样,一项美国预防服务工作的回顾性研究发现,建议在初级医疗机构中使用筛查量表的依据不足<sup>81</sup>。反对者认为这些评估工具效率低下(特异性和PPV低),预测能力低下,过度使用这些工具将造成医疗资源的不合理分配<sup>82</sup>。

此外,最能预测自杀风险的变量是既往自伤史,当然这部分人群可能已经在接受治疗。

自伤预测具有巨大的临床价值,但也具有巨大的挑战性,这是因为本身自我伤害的发生率就比较低。推荐将NPV应用于自杀风险评估,因为确定真正的假阴性结果有助于保护卫生资源。英国的一些观察性研究发现,评估行为本身就可以降低未来自杀风险<sup>83</sup>。这也是自杀风险评估容易忽略的方面,医患接触可以产生重要治疗作用。对实施自杀风险评估的学员进行培训极为重要,但困难重重,因为评估过程变化较大。因此,我们有必要在不同的区域建立一致的评估标准,努力践行国家自杀预防行动联盟推出的评估指南<sup>84</sup>。

### 风险评估指南

一些组织已经发布了用于评估和预防自杀的指南。这些指南涵盖了各个国家的国家医疗机构指南以及一些特定机构的指南。框图2详细列出了经选择后的在线指南。一篇发表在2014年的综述提到,尽管大多数指南的某些条目是相似的,但在如何进行风险分级、出院患者管理和限制措施,以及训练方式上还存在着许多分歧<sup>85</sup>。自杀预防指南一致的方面包括风险评估的重要性、保护性因素、澄清自杀意图,以及推荐适当的干预措施等。

### 心理疾病患者的自杀干预措施

心理保健可以降低自杀率<sup>86</sup>,然而大多数有自杀倾向的患者都没有接受过有效的治疗<sup>87</sup>。英国或美国的研究表明,仅有60%有过自伤史的患者在急诊部门接受过心理健康评估<sup>88-89</sup>。本章节将重点强调自杀特定领域的干预。尽管这不是一个全面的综述,但它可以对其他描述自杀干预的综述进行补充<sup>90-93</sup>。

### 药物治疗

有证据表明,药物可以降低自杀风险<sup>94</sup>。然

## 框图2 可供选择的在线自杀预防指南

### 世界卫生组织(WHO)

Self harm and suicide. 2015. [www.who.int/mental\\_health/mhgap/evidence/suicide/en/](http://www.who.int/mental_health/mhgap/evidence/suicide/en/)

### 国际预防自杀协会(IASP)

IASP guidelines for suicide prevention. 2015. [www.iasp.info/suicide\\_guidelines.php](http://www.iasp.info/suicide_guidelines.php)

### 英国国家健康与临床优选研究所(NICE)

Self-harm: the short-term physical and psychological management and secondary prevention of self-harm in primary and secondary care. 2004. [www.nice.org.uk/guidance/cg16/chapter/1-recommendations](http://www.nice.org.uk/guidance/cg16/chapter/1-recommendations)

New NICE guidance for the longer-term management of self-harm. 2011. [www.nice.org.uk/guidance/cg133/resources/new-nice-guidance-for-the-longer-term-management-of-self-harm](http://www.nice.org.uk/guidance/cg133/resources/new-nice-guidance-for-the-longer-term-management-of-self-harm)

### 美国精神病协会(APA)

Practice guideline for the assessment and treatment of patients with suicidal behaviors. 2010. [http://psychiatryonline.org/pb/assets/raw/sitewide/practice\\_guidelines/guidelines/suicide.pdf](http://psychiatryonline.org/pb/assets/raw/sitewide/practice_guidelines/guidelines/suicide.pdf)

### 澳大利亚和新西兰皇家医学院(RANZCP)

Australian and New Zealand clinical practice guidelines for the management of adult deliberate self-harm. 2004. [www.ranzcp.org/Files/Resources/Publications/CPG/Clinician/CPG\\_Clinician\\_Full\\_DSH-pdf.aspx](http://www.ranzcp.org/Files/Resources/Publications/CPG/Clinician/CPG_Clinician_Full_DSH-pdf.aspx)

### 物质滥用和精神健康服务管理局(SAMHSA)

SuicideAssessment Five-step Evaluation and Triage. 2009. [www.integration.samhsa.gov/clinical-practice/safe-t\\_card.pdf](http://www.integration.samhsa.gov/clinical-practice/safe-t_card.pdf)

而,还没有专门针对药物预防精神疾病患者自杀的RCT研究。在一些高收入国家开展的心理解剖研究发现,90%死于自杀的患者都与他们当时的精神障碍相关<sup>95</sup>,这表明精神疾病是一个重要且可改变的风险因素。这意味着药物治疗精神疾病是预防自杀的重要途径。

### 抗抑郁药

识别和治疗抑郁是预防自杀的关键<sup>10</sup>。研究表明,抗抑郁药可以减少自杀的想法和行为(尽管它们对自杀的影响充满争议,而且可能会随着年龄的变化而发生改变)。一项非系统性综述曾描述了一系列的临床队列研究,结果表明服用抗抑郁药的抑郁患者,其自杀行为和观念降低40%~81%<sup>96</sup>。一项抗抑郁药的安慰剂、随机对照的荟萃分析表明,25岁以下服用抗抑郁药发生自杀观念和行为的危险显著升高(比值比1.62,95%可信区间0.97~

2.71),但在25~64岁年龄段(0.79,0.64~0.98)和65岁以上(0.37,0.18~0.76)的人群中,抗抑郁药则具有抵抗自杀的作用<sup>97</sup>。一项芬兰的观察性研究表明,与不服用抗抑郁药的患者相比,服用抗抑郁药者企图自杀的风险上升39%,但自杀行为却降低了32%<sup>98</sup>。未服用抗抑郁药者在1个月内自杀企图的风险是服用抗抑郁患者的2.5倍<sup>99</sup>。在解释这些结果的时候,也要考虑均数回归对结果造成的可能影响,因为抑郁可能会自我缓解,从而降低自杀的风险,但这与治疗与否并无明显关联。

### 服毒

大量服用抗精神病药自杀是使用抗精神病药物常见的挑战,而中毒剂量与治疗剂量也同样如此。在英国,有20%的人曾服用抗抑郁药自杀<sup>100</sup>,而三环类抗抑郁药通常是最致命的。一项英国的研究发现,服用过量三环类抗抑郁药的致死性是服用选择性5-羟色胺再摄取抑制剂(SSRIs)的20倍<sup>101</sup>。此研究包含了英格兰和威尔士自杀的人群,1 088例死亡与服用三环类抗抑郁药有关,而仅有85例死于SSRIs。

服用文拉法辛过量具有中等风险。在所有的SSRIs中,西酞普兰致死的风险最大。当患者具有潜在的自杀风险时(如不断服毒的患者),临床医师应当选择可以降低这些风险的药物,此外,至少在治疗的早期阶段以及风险最大的阶段,选用单一的处方药进行治疗。

### 与自杀行为的联系

考虑到12年前美国食品与药品监督管理局(FDA)颁布的自杀行为与抗抑郁药的黑色警告,这个问题就变得更加复杂了。直到今天为止,这些争议还仍然存在,反对者建议减少抗抑郁药的使用量,但美国的临床医师则认为抑郁症患者如果减少服用抗抑郁药将导致自杀风险升高<sup>102-103</sup>。

一项纳入了4项RCT的研究发现,青年人(708名)服用氟西汀治疗抑郁并不会增加自杀行为<sup>104</sup>。而一项荟萃分析则表明,对于所有使用抗抑郁药治疗的抑郁患者(4 780名年轻患者),服用抗抑郁药增加2.3倍的自杀行为(1.04~5.09)。这一发现表明,服用抗抑郁药与安慰剂相比,每1 000人中就有3.6人死于自杀<sup>97</sup>。然而,老年人群服用抗抑郁药可以明显降低自杀行为。主动监测服用抗抑郁药患者的自杀观念,特别是年轻的患者,并积极随访是比较合理的临床决策,有助于降低治疗早期阶段的自杀风险。

## 其他精神病药物

### 锂

锂盐的抗自杀作用已得到公认<sup>96</sup>。对单相或双相患者和RCT研究的荟萃分析表明,与安慰剂相比,锂盐能够显著降低自杀风险(比值比0.13,0.03~0.66)<sup>105-106</sup>。有趣的是,观察性研究发现,饮用水中自然含的锂盐与自杀呈负相关,而且含高浓度锂盐地区的自杀风险明显低于其他地区<sup>107-109</sup>。丹麦的一项观察性研究发现,出院患者继续服用锂盐比那些仅服用过一次锂盐的自杀风险要低(相对风险0.43,0.2~0.69)<sup>110</sup>。综上所述,各种证据均支持锂盐可以预防心境障碍患者实施自杀行为的结论。

### 抗癫痫药

也有证据表明,其他的心境稳定剂可以降低自杀的风险,尽管大部分的数据仅来源于观察性研究<sup>111</sup>。一项双相障碍的队列研究表明,与没有服用抗癫痫药物的患者相比,服药者自杀的尝试将降低81%<sup>112</sup>。当与患者服药前的状况相比,这种保护性的作用仍然存在。在丹麦进行的一项观察性研究表明,与锂盐相似,持续服用抗癫痫药物比单独服用某种处方药相比,具有更低的自杀率<sup>113</sup>。然而,美国的一项大规模队列研究发现,服用丙戊酸钠比服用锂盐的自杀风险将高出2.7倍<sup>114</sup>。

### 氯氮平

已证实氯氮平可以降低精神分裂症患者的自杀行为<sup>115</sup>,但常作为备选药物<sup>116</sup>。观察性研究和随机试验的荟萃分析表明,与服用其他抗精神病药相比,服用氯氮平的自杀风险明显下降(相对风险3.3,1.7~6.3)<sup>117</sup>。

### 氯胺酮:一种新型治疗药物

早期证据表明,氯胺酮可以有效预防自杀<sup>118</sup>。氯胺酮似乎具有独特的抗抑郁作用,快速起效(通常在几小时内),机制可能与通过N-甲基-D-天冬氨酸(NMDA)神经递质系统来促进重要神经生理机制有关<sup>119</sup>。它也能在数小时内降低自杀风险,主要但并非完全通过缓解抑郁症状来实现该作用<sup>120</sup>。一项以咪达唑仑为安慰剂的RCT研究表明,53%服用氯胺酮的患者24小时内在3种不同检测自杀观念的测验上得分为0,而服用安慰者,只有24%<sup>121</sup>。IAT测验也表明自杀观念被无意识降低了。有趣的是,氯胺酮单独的抗自杀效应可以维持数天<sup>122</sup>。

尽管这些发现令人信服,但有关氯胺酮对自杀影响的数据还是很有限的,而且还没有研究探讨它



对自杀行为和自杀的影响。未来的研究将有望回答这些重要问题,如氯胺酮的最佳剂量、服药频率、安全性和长期影响。氯胺酮还未正式上市,但该药无疑是有自杀倾向患者的一种选择。

### 电抽搐治疗(ECT)

ECT早已被证实是抑郁症患者非常有效的治疗手段,用于严重且耐药的病例,并且常推荐给具有顽固自杀观念的患者<sup>123</sup>。ECT可以迅速清除抑郁患者的自杀观念。一项队列研究表明,38%患者在经过3次ECT治疗后可消除自杀观念,6次治疗后,这一比率上升至62%<sup>124-126</sup>。一项基于芬兰人口的自杀研究表明,经过ECT治疗的患者,在3个月内实施自杀行为的概率非常低,间接表明了ECT的保护性作用<sup>127</sup>。尽管ECT似乎能在短时间内减少自杀的想法和观念,但有限数据表明ECT对长期的自杀预防作用并不显著。但具有高自杀风险的患者依然建议接受ECT治疗,尽管目前大多数随访研究的方法学都有缺陷,也并非专门研究对自杀的影响<sup>128-129</sup>。

### 心理治疗

2014年发表的一篇非系统性综述总结了常见的心理治疗对自杀行为的影响,其纳入的研究都是RCT<sup>130</sup>。这项研究中的人群大多都有自伤的病史。接受过心理治疗的患者与未接受过治疗的对照组相比,未来自杀的风险将降低32%<sup>81</sup>。然而,我们必须考虑到这项结果的混合效应,因为纳入了许多不同的心理治疗手段,如认知行为治疗(CBT)、辩证行为治疗(DBT)和问题解决治疗等。另外,不同的心理治疗实施的人群也有所差异。因此,仍需要更大的试验来确定最有效预防自杀的心理学方法。

一些研究表明,CBT可以减少最近曾实施过自伤行为或因自伤送入急诊患者的自杀观念。最新研究表明,CBT组的患者与对照组相比,再次自杀的风险下降50%<sup>131-132</sup>。接受过DBT治疗的双相障碍患者,其未来的自杀风险是对照组的一半<sup>133</sup>,并且他们的自杀行为将减少0.91<sup>134</sup>。新西兰的一项大规模、随访1年以上的研究发现,经过问题解决治疗的患者再次发生自伤的概率与对照组相比,下降61%,但不包括那些仅实施过1次自杀行为的患者<sup>135</sup>。

这些干预背后的机制还不甚明了。具体而言,还没有RCT证实心理治疗可以降低自杀的风险,其原因可能与缺乏统计效力有关。丹麦一项大规模的观察

性研究发现,对实施过自杀行为的患者进行心理治疗,未来的自杀风险下降0.5%<sup>136</sup>。一项研究急诊自杀干预的荟萃分析表明,仅有2项研究分析了患者12个月发生自杀行为的情况,但其结果却是阴性的<sup>137</sup>。

### 在线方法

在线为高自杀风险人群提供心理治疗是不错的选择,原因包括访问、医疗保健的成本及病耻感。荷兰的一项研究表明,CBT、DBT、正念治疗及问题解决治疗都可以稍微降低自杀观念(效应量 $d=0.28, 0.03-0.54$ )<sup>138</sup>。这一发现在具有自杀史人群中的作用更为明显。然而,在人们呼唤在线心理治疗的过程中,网络上的CBT治疗与传统的抑郁症治疗方法相比,并不能降低自杀观念<sup>139</sup>。这就提出了一个有意思的现象,针对潜在在精神疾病的心理治疗,并不足以降低患者的自杀观念。一项荟萃分析表明,抑郁症状的心理治疗并不能显著降低自杀观念<sup>140</sup>,这就意味着我们需要发展专门针对自杀症状的心理治疗。此项荟萃分析仅纳入了3项研究,而且许多抑郁症的治疗试验已将自杀者排除在外。

### 随访照护

对自杀患者进行随访照护的方法有很多种,包括电话随访、重复评估、个案管理和写关怀信件或贺卡等<sup>141</sup>。患者本人在与精神服务机构接触一段时间后就常要求进行心理照护,最初他们最喜欢以电话访谈的方式,但随后他们更喜欢采用信件进行交流<sup>142</sup>。一项非系统性综述研究表明,在5个随访心理照护的研究中,有4项研究结果好坏参半,有2项研究则没有证实心理治疗能明显降低自杀风险<sup>92</sup>。然而,一项加强常规照护(定义为,提高治疗强度或依从性,但很少直接接触)的荟萃分析表明,有很多研究并不能真正降低自杀尝试(相对风险,成人0.90,0.80~1.02;青少年1.44,0.36~5.76)<sup>81</sup>。

社区心理保健预防自杀的重要性在许多国家已然证实。一项全国性自杀率的随访研究表明,根据英国颁布的指南,有些形式的社区心理保健,如7天住院日随访、对失访患者进行再预约,可以明显降低自杀率,分别为0.53/10 000/年和0.34/10 000/年<sup>86</sup>。国家政策的改变,如出院后的12星期内加强监护,可显著降低1周内非致命性的自伤(14%)和1个月内的自我伤害(11%)<sup>143</sup>。芬兰一项自然病程观察研究表明,在自杀率低的城区中,门诊数量要高于住院数量(相对风险0.93 0.89~0.97)<sup>144</sup>。

### 未来研究的问题

- 当考虑到预防自杀行为所面临的挑战时,什么才是自杀风险评估的合理标准?
- 是否大规模的、纵向的,以及多种多样的评估方法可在短时间内提高自杀风险的预测能力?
- 能够降低患者在住院期间及出院后(包括急诊及其他治疗机构)几周或几个月内自杀风险的最有效的治疗方法是什么?
- 如何将神经心理测验用于临床实践?如何劝说存在自伤意识(但自我却未意识到)的患者接受治疗?
- 鉴于精神疾病治疗资源的有限性,有效的自杀风险评估方法和治疗手段是否能够得以全面推广?

另一项荟萃分析表明,汇总随访护理的几种方法(电话、明信片、信件和贺卡)都可以使自伤的数量下降(时间发生率比为0.66,0.54~0.80),但不大可能降低自杀风险<sup>145</sup>。这项研究还专门将自杀的结果作为研究,尽管有自杀下降的趋势,但尚达不到统计学上的差异。一项包含在该荟萃分析中的研究为多国参与的RCT研究,纳入了2 000多例因自杀未遂而送急诊的患者。比较了常规的治疗手段(包括1小时的访谈和在18个月后的9小时随访、电话或亲自拜访)<sup>146</sup>,结果表明,与正常对照组相比,干预组自杀率最低(0.2%比2.2%, $P<0.001$ ),但重复自杀率在两组间没有显著性差异(7.6%比7.5%; $P=0.909$ )<sup>147</sup>。一项瑞典的RCT研究纳入了2项1年以上的电话访谈研究(包括在上述的荟萃分析之内),结果表明电话随访与对照组相比,对未来的自杀尝试无差异<sup>148</sup>。在对西班牙急诊自杀患者的对照研究中发现,第二年的6次电话随访与对照组相比,将降低重复自杀率(6%比14%)和延长下一次的自杀尝试<sup>149</sup>。

一项丹麦的RCT研究分析了宣教对出院后患者自杀的影响,采用的方法包括安排8~20次后续会议、电话随访、文本信息电话和院外会谈等<sup>150</sup>。研究结果并不支持宣教方法优于传统治疗的结论(干预组的自杀尝试率为16%,而对照组为11%)。

给出院后的自杀患者寄明信片 and 邮件是非常便宜和便捷的,但这种方法的结果却很复杂。澳大利亚的一项RCT研究发现,给服毒自杀患者在12个月后寄明信片并不能降低自伤的风险,但却可以减少其自伤的次数(事件风险比0.55,0.35~0.87, $P=0.01$ )<sup>151</sup>。12个月与5年后的结果相似(5年后0.54,

0.37~0.81, $P<0.01$ )<sup>152-153</sup>。这些结果表明,在干预结束的时候,明信片仍具有稳定的干预作用。伊朗的一项研究发现,在明信片被寄出1个月后,1年内的自杀观念、自杀企图和自杀次数均明显下降<sup>154</sup>。24个月后,仍保持稳定,与对照组相比,干预组的自杀观念降低了80%( $P<0.001$ ),自杀尝试降低了69%( $P=0.02$ )<sup>155</sup>。另一项RCT研究发现,在所有最初拒绝随访的精神疾病患者中,那些每5年收到一次信件的患者自杀率比没有收到信件的患者自杀率要低(3.9%比4.6%),尽管这个结果仅在研究的前2年比较显著( $P=0.043$ )<sup>156</sup>。相反,新西兰、中国台湾和英格兰的有关明信片的研究,则没有表现出明显的自伤和自杀率下降<sup>157-159</sup>。

### 结论

评估和管理自杀患者极具挑战性,而且目前有效的方法还很有限。我们期待着自杀预防学科的发展,并提高更多相关研究的数量及质量。尽管如此,已有的证据表明,几种临床实践可以提高自杀人群的管理。鉴于当前的风险预测工具的预测能力还很有限,因此,我们还需要发展价格低廉、使用便捷的评估工具,以减少假阳性结果。重要的是承认自杀者与服务机构之间存在着时间差异。另一方面,识别已经存在的风险因素如自伤史也是非常重要的。最后,在决定治疗方法时,临床医师应将自杀观念和作为重要的治疗目标。

The authors would like to acknowledge Hayley Chartrand, Yunqiao Wang, and Joanna Bhaskaran for their help with the literature search and manuscript preparation.

利益竞争(Competing interests): We have read and understood BMJ policy on declaration of interests and declare the following interests: none.  
贡献者(Contributors): All authors helped plan and prepare the manuscript and they meet all four ICMJE authorship criteria. Hayley Chartrand, Yunqiao Wang, and Joanna Bhaskaran contributed to the manuscript by performing literature searches and helping with manuscript preparation. JMB wrote the manuscript and is responsible for the overall content as guarantor. The guarantor accepts full responsibility for the work and/or the conduct of the study, had access to the data, and controlled the decision to publish.

资助(Funding): JMB is supported by a Canadian Institutes of Health Research new investigator award (113589) and a Brain and Behavior Research Foundation NARSAD young investigator grant. DG is a National Institute for Health Research senior investigator. GT is supported by grants from the Canadian Institute of Health Research MOP93775, MOP11260, MOP119429, and MOP119430; from the National Institutes of Health 1R01DA033684-01; and by the Fonds de Recherche du Québec-Santé through a Chercheur National salary award and through the Quebec Network on Suicide, Mood Disorders, and Related Disorders.

参考文献见 [bmj.com](http://bmj.com) 和 [bmj.yiigle.com](http://bmj.yiigle.com)。

BMJ takes no responsibility for the accuracy of the translation from the published English language original and is not liable for any errors that may occur.

# BMJ
